# Supplementary material for: Combination of serum histidine and plasma tryptophan as a potential biomarker to detect clear cell renal cell carcinoma
Source: Springer Nature journal article supplement (doi:10.1186/s12967-017-1178-8), 2017-04-06
Supplement: MOESM2 [file 12206062]

### Additional file 2: Fig. S1a

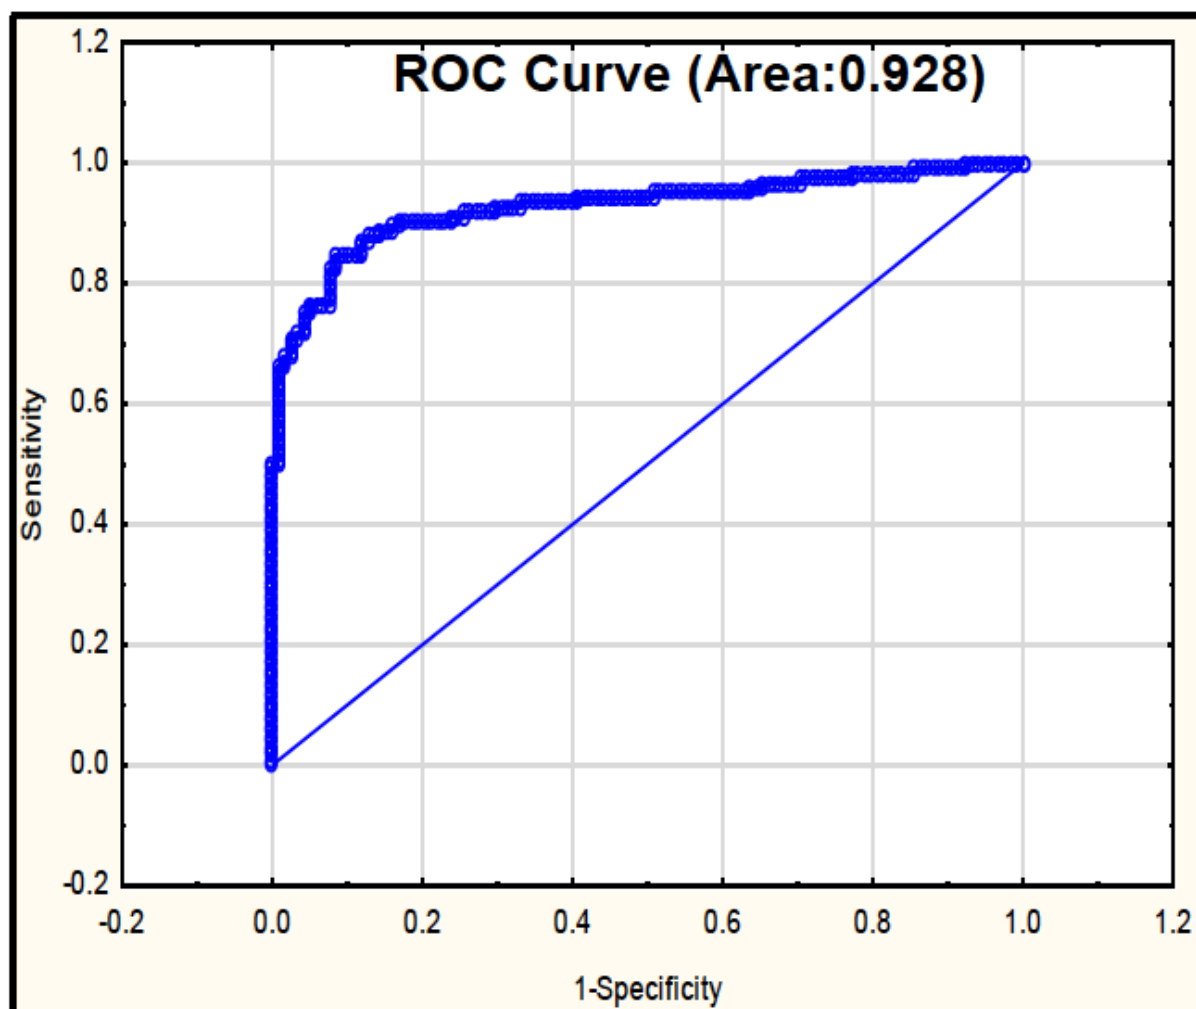

| Effect    | Wald scores | p        |
|-----------|-------------|----------|
| Intercept | 47.8731     | 0.000000 |
| Ser       | 10.4941     | 0.001198 |
| His       | 22.5233     | 0.000002 |
| aaba      | 4.8395      | 0.027815 |
| Asn       | 11.7457     | 0.000610 |
| Arg       | 6.5908      | 0.010251 |
| Gly       | 4.8875      | 0.027052 |

|                   | Predicted Controls | Predicted Cases | % Correct |
|-------------------|--------------------|-----------------|-----------|
| Observed Controls | 105                | 19              | 84.7      |
| Observed Cases    | 12                 | 106             | 89.8      |

### Additional file 2: Fig. S1b

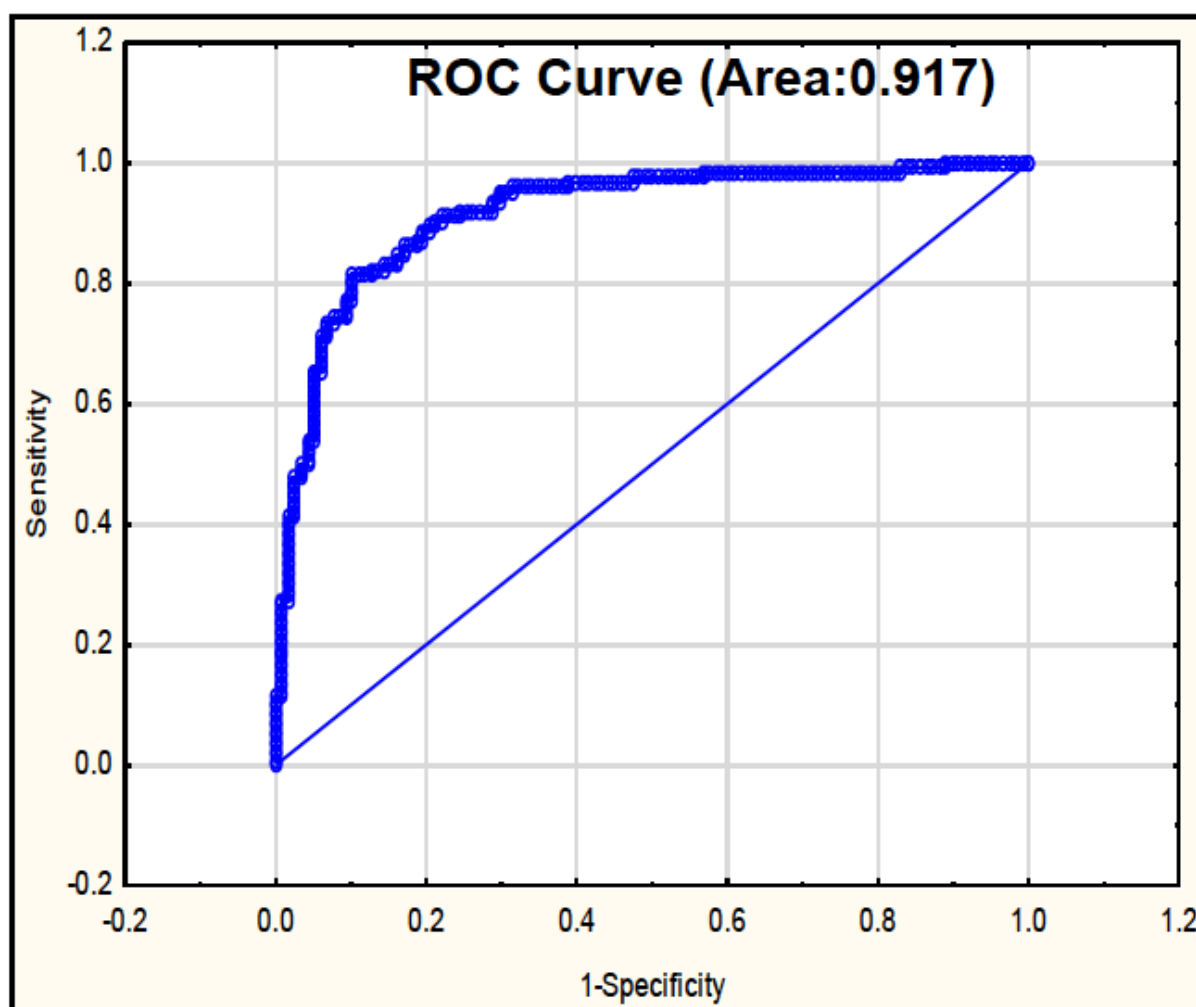

| Effect    | Wald scores | p        |
|-----------|-------------|----------|
| Intercept | 30.4504     | 0.000000 |
| Trp       | 36.4898     | 0.000000 |
| Asn       | 37.1814     | 0.000000 |
| Cys       | 21.2199     | 0.000004 |
| Arg       | 14.6413     | 0.000130 |
| Asp       | 9.4839      | 0.002073 |
| Ser       | 5.1989      | 0.022601 |

|                   | Predicted Controls | Predicted Cases | % Correct |
|-------------------|--------------------|-----------------|-----------|
| Observed Controls | 103                | 21              | 83.1      |
| Observed Cases    | 18                 | 100             | 84.7      |
